# Supplementary material for: Multi-temperature synchrotron PXRD and physical properties study of half-Heusler TiCoSb
Source: Royal Society of Chemistry journal article supplement (doi:10.1039/c0dt00742k), 2010-01-01
Supplement: c0dt00742k.pdf [file c0dt00742k.pdf]

**SUPPLEMENTARY INFORMATION**

**PHASE PURE TiCoSb REFINEMENT (90-650 K)**

| Temperature           | 90 K          | 100 K         | 110 K         | 120 K         |
|-----------------------|---------------|---------------|---------------|---------------|
| Exposure time (min)   | 5             | 5             | 5             | 5             |
| # (Observation)       | 5699          | 5699          | 5699          | 5699          |
| # (reflections)       | 190           | 190           | 190           | 190           |
| # (parameters)        | 75            | 75            | 75            | 75            |
| R <sub>F</sub>        | 0.0104        | 0.0102        | 0.0104        | 0.0102        |
| R <sub>Bragg</sub>    | 0.0186        | 0.0185        | 0.0189        | 0.0195        |
| R <sub>p</sub>        | 0.0796        | 0.0803        | 0.0799        | 0.0799        |
| R <sub>wp</sub>       | 0.101         | 0.101         | 0.101         | 0.102         |
| χ <sup>2</sup>        | 14.5          | 14.58         | 14.41         | 14.5          |
| Scale factor (TiCoSb) | 0.0002583 (5) | 0.0002590 (5) | 0.0002564 (5) | 0.0002548 (5) |
| Zero displament       | -0.0122 (3)   | -0.0091 (3)   | -0.0070 (3)   | -0.0062 (3)   |
| a TiCoSb              | 5.87172 (6)   | 5.87207 (6)   | 5.87267 (6)   | 5.87322 (6)   |
| U TiCoSb              | 0.014 (2)     | 0.013 (2)     | 0.012 (2)     | 0.012 (2)     |
| V TiCoSb              | 0.0167 (7)    | 0.0173 (7)    | 0.0175 (7)    | 0.0174 (7)    |
| W TiCoSb              | 0.00023 (4)   | 0.00019 (4)   | 0.00018 (4)   | 0.00018 (4)   |
| Asym1 TiCoSb          | 0.0064 (1)    | 0.0070 (1)    | 0.0067 (1)    | 0.0071 (1)    |
| Asym2 TiCoSb          | 0.0033 (2)    | 0.0034 (2)    | 0.0034 (2)    | 0.0035 (2)    |
| U <sub>iso</sub> Ti   | 0.0006 (1)    | 0.0007 (1)    | 0.0007 (1)    | 0.0009 (1)    |
| U <sub>iso</sub> Co   | 0.0003 (1)    | 0.0003 (1)    | 0.0004 (1)    | 0.0005 (1)    |
| U <sub>iso</sub> Sb   | 0.00019 (8)   | 0.00025 (8)   | 0.00035 (8)   | 0.00041 (8)   |

| Temperature           | 130 K         | 140 K         | 150 K         | 160 K         |
|-----------------------|---------------|---------------|---------------|---------------|
| Exposure time (min)   | 5             | 5             | 5             | 5             |
| # (Observation)       | 5699          | 5699          | 5699          | 5699          |
| # (reflections)       | 190           | 190           | 190           | 190           |
| # (parameters)        | 75            | 75            | 75            | 75            |
| R <sub>F</sub>        | 0.0104        | 0.0104        | 0.0102        | 0.0102        |
| R <sub>Bragg</sub>    | 0.0191        | 0.0183        | 0.019         | 0.019         |
| R <sub>p</sub>        | 0.0797        | 0.0796        | 0.0793        | 0.0794        |
| R <sub>wp</sub>       | 0.101         | 0.101         | 0.101         | 0.101         |
| χ <sup>2</sup>        | 14.61         | 14.58         | 14.77         | 14.77         |
| Scale factor (TiCoSb) | 0.0002599 (5) | 0.0002618 (5) | 0.0002636 (5) | 0.0002635 (5) |
| Zero displament       | -0.0061 (3)   | -0.0072 (3)   | -0.0092 (3)   | -0.0092 (3)   |
| a TiCoSb              | 5.87381 (6)   | 5.87443 (6)   | 5.87511 (6)   | 5.87511 (6)   |
| U TiCoSb              | 0.012 (2)     | 0.013 (2)     | 0.012 (2)     | 0.012 (2)     |

|                     |             |             |             |             |
|---------------------|-------------|-------------|-------------|-------------|
| V TiCoSb            | 0.0174 (7)  | 0.0175 (7)  | 0.0174 (7)  | 0.0174 (7)  |
| W TiCoSb            | 0.00018 (4) | 0.00017 (4) | 0.00018 (4) | 0.00018 (4) |
| Asym1 TiCoSb        | 0.0069 (1)  | 0.0060 (1)  | 0.0057 (1)  | 0.0057 (1)  |
| Asym2 TiCoSb        | 0.0034 (2)  | 0.0034 (2)  | 0.0033 (2)  | 0.0033 (2)  |
| U <sub>iso</sub> Ti | 0.0009 (1)  | 0.0011 (1)  | 0.0011 (1)  | 0.0011 (1)  |
| U <sub>iso</sub> Co | 0.0006 (1)  | 0.0007 (1)  | 0.0007 (1)  | 0.0007 (1)  |
| U <sub>iso</sub> Sb | 0.00049 (8) | 0.00058 (8) | 0.00066 (8) | 0.00066 (8) |

| Temperature           | 170 K         | 180 K         | 190 K         | 200 K         |
|-----------------------|---------------|---------------|---------------|---------------|
| Exposure time (min)   | 5             | 5             | 5             | 5             |
| # (Observation)       | 5699          | 5699          | 5699          | 5699          |
| # (reflections)       | 190           | 190           | 190           | 190           |
| # (parameters)        | 75            | 75            | 75            | 75            |
| R <sub>F</sub>        | 0.00997       | 0.0102        | 0.0103        | 0.00991       |
| R <sub>Bragg</sub>    | 0.0178        | 0.0181        | 0.0178        | 0.0171        |
| R <sub>p</sub>        | 0.0791        | 0.0798        | 0.0801        | 0.0795        |
| R <sub>wp</sub>       | 0.0995        | 0.100         | 0.100         | 0.0993        |
| $\chi^2$              | 14.15         | 14.44         | 14.55         | 14.39         |
| Scale factor (TiCoSb) | 0.0002633 (5) | 0.0002656 (5) | 0.0002701 (5) | 0.0002724 (6) |
| Zero displant         | -0.0054 (3)   | -0.0088 (3)   | -0.0123 (3)   | -0.0162 (3)   |
| a TiCoSb              | 5.87651 (6)   | 5.87723 (6)   | 5.87793 (6)   | 5.87863 (6)   |
| U TiCoSb              | 0.011 (2)     | 0.012 (2)     | 0.011 (2)     | 0.011 (2)     |
| V TiCoSb              | 0.0178 (7)    | 0.0175 (7)    | 0.0181 (7)    | 0.0179 (7)    |
| W TiCoSb              | 0.00015 (4)   | 0.00017 (4)   | 0.00014 (4)   | 0.00014 (4)   |
| Asym1 TiCoSb          | 0.0046 (1)    | 0.0040 (1)    | 0.0028 (1)    | 0.0027 (1)    |
| Asym2 TiCoSb          | 0.0032 (2)    | 0.0032 (2)    | 0.0031 (2)    | 0.0030 (2)    |
| U <sub>iso</sub> Ti   | 0.0012 (1)    | 0.0013 (1)    | 0.0015 (1)    | 0.0016 (1)    |
| U <sub>iso</sub> Co   | 0.0009 (1)    | 0.0009 (1)    | 0.0011 (1)    | 0.0013 (1)    |
| U <sub>iso</sub> Sb   | 0.00086 (8)   | 0.00093 (8)   | 0.00108 (8)   | 0.00119 (8)   |

| Temperature         | 210 K   | 220 K   | 240 K   | 260 K   |
|---------------------|---------|---------|---------|---------|
| Exposure time (min) | 5       | 5       | 5       | 5       |
| # (Observation)     | 5699    | 5699    | 5699    | 5699    |
| # (reflections)     | 190     | 191     | 191     | 191     |
| # (parameters)      | 75      | 75      | 75      | 75      |
| R <sub>F</sub>      | 0.00987 | 0.00981 | 0.00952 | 0.00916 |
| R <sub>Bragg</sub>  | 0.0169  | 0.0158  | 0.016   | 0.0157  |
| R <sub>p</sub>      | 0.0798  | 0.0798  | 0.0803  | 0.0799  |

|                       |               |               |               |               |
|-----------------------|---------------|---------------|---------------|---------------|
| R <sub>wp</sub>       | 0.0992        | 0.0991        | 0.0989        | 0.0988        |
| $\chi^2$              | 14.5          | 14.26         | 14.11         | 14.09         |
| Scale factor (TiCoSb) | 0.0002760 (6) | 0.0002736 (6) | 0.0002742 (6) | 0.0002766 (6) |
| Zero displacement     | -0.0109 (3)   | -0.0076 (3)   | -0.0051 (3)   | -0.0138 (3)   |
| <i>a</i> TiCoSb       | 5.87939 (6)   | 5.88009 (6)   | 5.88123 (6)   | 5.88237 (6)   |
| U TiCoSb              | 0.012 (2)     | 0.012 (2)     | 0.011 (2)     | 0.013 (2)     |
| V TiCoSb              | 0.0175 (7)    | 0.0175 (7)    | 0.0178 (7)    | 0.0173 (7)    |
| W TiCoSb              | 0.00018 (4)   | 0.00018 (4)   | 0.00015 (4)   | 0.00018 (4)   |
| Asym1 TiCoSb          | 0.0030 (1)    | 0.0027 (1)    | 0.0028 (1)    | 0.0023 (1)    |
| Asym2 TiCoSb          | 0.0031 (2)    | 0.0030 (2)    | 0.0031 (2)    | 0.0030 (2)    |
| U <sub>iso</sub> Ti   | 0.0017 (1)    | 0.0018 (1)    | 0.0021 (1)    | 0.0023 (1)    |
| U <sub>iso</sub> Co   | 0.0013 (1)    | 0.0014 (1)    | 0.0018 (1)    | 0.0020 (1)    |
| U <sub>iso</sub> Sb   | 0.00134 (8)   | 0.00148 (8)   | 0.00174 (8)   | 0.00197 (9)   |

| Temperature           | 280 K         | 300 K        | 550 K         | 600 K         |
|-----------------------|---------------|--------------|---------------|---------------|
| Exposure time (min)   | 5             | 5            | 5             | 5             |
| # (Observation)       | 5699          | 5699         | 5699          | 5699          |
| # (reflections)       | 191           | 191          | 191           | 191           |
| # (parameters)        | 75            | 75           | 75            | 75            |
| R <sub>F</sub>        | 0.00953       | 0.00899      | 0.00967       | 0.00915       |
| R <sub>Bragg</sub>    | 0.017         | 0.0113       | 0.0142        | 0.013         |
| R <sub>p</sub>        | 0.0812        | 0.086        | 0.0969        | 0.097         |
| R <sub>wp</sub>       | 0.0993        | 0.106        | 0.108         | 0.112         |
| $\chi^2$              | 14.31         | 65.91        | 9.067         | 9.63          |
| Scale factor (TiCoSb) | 0.0002806 (6) | 0.001135 (2) | 0.0001689 (4) | 0.0001678 (4) |
| Zero displacement     | -0.0136 (3)   | -0.0182 (3)  | -0.0032 (3)   | -0.0069 (3)   |
| <i>a</i> TiCoSb       | 5.88354 (6)   | 5.88246 (6)  | 5.89356 (7)   | 5.89593 (7)   |
| U TiCoSb              | 0.011 (2)     | 0.010 (2)    | 0.022 (2)     | 0.026 (2)     |
| V TiCoSb              | 0.0180 (7)    | 0.0182 (7)   | 0.0098 (7)    | 0.0081 (7)    |
| W TiCoSb              | 0.00014 (4)   | 0.00011 (5)  | 0.00043 (4)   | 0.00047 (4)   |
| Asym1 TiCoSb          | 0.0023 (1)    | -0.0011 (1)  | 0.0024 (1)    | 0.0002 (1)    |
| Asym2 TiCoSb          | 0.0029 (2)    | 0.0032 (2)   | 0.0033 (2)    | 0.0031 (2)    |
| U <sub>iso</sub> Ti   | 0.0026 (2)    | 0.0028 (2)   | 0.0054 (2)    | 0.0058 (2)    |
| U <sub>iso</sub> Co   | 0.0022 (1)    | 0.0024 (1)   | 0.0048 (2)    | 0.0053 (2)    |
| U <sub>iso</sub> Sb   | 0.00219 (9)   | 0.0025 (1)   | 0.0047 (1)    | 0.0049 (1)    |

|                     |       |
|---------------------|-------|
| Temperature         | 650 K |
| Exposure time (min) | 5     |
| # (Observation)     | 5699  |

|                       |               |
|-----------------------|---------------|
| # (reflections)       | 191           |
| # (parameters)        | 75            |
| R <sub>F</sub>        | 0.00856       |
| R <sub>Bragg</sub>    | 0.0151        |
| R <sub>p</sub>        | 0.100         |
| R <sub>wp</sub>       | 0.118         |
| $\chi^2$              | 10.73         |
| Scale factor (TiCoSb) | 0.0001699 (4) |
| Zero displacement     | -0.0102 (3)   |
| <i>a</i> TiCoSb       | 5.89838 (7)   |
| U TiCoSb              | 0.029 (3)     |
| V TiCoSb              | 0.0062 (7)    |
| W TiCoSb              | 0.00053 (4)   |
| Asym1 TiCoSb          | -0.0006 (1)   |
| Asym2 TiCoSb          | 0.0031 (2)    |
| U <sub>iso</sub> Ti   | 0.0062 (2)    |
| U <sub>iso</sub> Co   | 0.0056 (2)    |
| U <sub>iso</sub> Sb   | 0.0051 (1)    |

### REFINEMENT INCLUDING CoSb (700-1000 K)

| Temperature                 | 700 K         | 750 K         | 800 K         | 850 K         |
|-----------------------------|---------------|---------------|---------------|---------------|
| Exposure time (min)         | 5             | 5             | 5             | 5             |
| # (observation)             | 5699          | 5699          | 5699          | 5699          |
| # (reflections)             | 692           | 690           | 684           | 686           |
| # (reflections)             | 78            | 78            | 78            | 78            |
| R <sub>F</sub> (TiCoSb)     | 0.00753       | 0.00826       | 0.00842       | 0.0105        |
| R <sub>Bragg</sub> (TiCoSb) | 0.0129        | 0.0133        | 0.0139        | 0.0155        |
| R <sub>p</sub>              | 0.0978        | 0.11          | 0.122         | 0.123         |
| R <sub>wp</sub>             | 0.119         | 0.128         | 0.139         | 0.142         |
| $\chi^2$                    | 10.64         | 11.92         | 13.6          | 13.72         |
| Zero displacement           | -0.0130 (3)   | -0.0065 (3)   | -0.0113 (3)   | -0.0074 (3)   |
| scale factor (TiCoSb)       | 0.0001674 (4) | 0.0001627 (4) | 0.0001565 (4) | 0.0001470 (4) |
| scale factor (CoSb)         | 0.0000034 (5) | 0.0000132 (7) | 0.0000373 (9) | 0.000100 (2)  |
| <i>a</i> TiCoSb             | 5.90103 (7)   | 5.90379 (7)   | 5.90621 (8)   | 5.90866 (8)   |
| U TiCoSb                    | 0.001 (2)     | 0.001 (2)     | 0.001 (2)     | 0.001 (2)     |
| V TiCoSb                    | 0.0308 (6)    | 0.0314 (6)    | 0.0328 (7)    | 0.0322 (7)    |
| W TiCoSb                    | 0.00483 (4)   | 0.00350 (4)   | 0.00196 (4)   | 0.00090 (4)   |
| Asym1 TiCoSb                | 0.000 (1)     | 0.000 (1)     | -0.001 (1)    | 0.000 (1)     |
| Asym2 TiCoSb                | 0.0031 (2)    | 0.0029 (2)    | 0.0027 (2)    | 0.0024 (2)    |

|                              |             |             |             |             |
|------------------------------|-------------|-------------|-------------|-------------|
| $U_{\text{iso}}$ Ti (TiCoSb) | 0.0067 (2)  | 0.0071 (2)  | 0.0076 (3)  | 0.0080 (3)  |
| $U_{\text{iso}}$ Co (TiCoSb) | 0.0062 (2)  | 0.0066 (2)  | 0.0071 (2)  | 0.0076 (3)  |
| $U_{\text{iso}}$ Sb (TiCoSb) | 0.0055 (1)  | 0.0059 (1)  | 0.0062 (2)  | 0.0066 (2)  |
| $a$ CoSb                     | 3.89269 (2) | 3.90770 (6) | 3.91904 (3) | 3.92312 (1) |
| $c$ CoSb                     | 5.33324 (2) | 5.31003 (7) | 5.21553 (3) | 5.21811 (1) |
| Weight fraction (TiCoSb)     | 99.7 (3)    | 98.9 (4)    | 96.9 (4)    | 91.7 (4)    |
| Weight fraction (CoSb)       | 0.28 (4)    | 1.08 (6)    | 3.07 (8)    | 8.3 (2)     |

| Temperature                  | 900 K         | 950 K         | 1000 K        |
|------------------------------|---------------|---------------|---------------|
| Exposure time (min)          | 5             | 5             | 5             |
| # (observation)              | 5699          | 5699          | 5699          |
| # (reflections)              | 689           | 689           | 693           |
| # (reflections)              | 78            | 78            | 78            |
| $R_{\text{F}}$ (TiCoSb)      | 0.0104        | 0.0113        | 0.0134        |
| $R_{\text{Bragg}}$ (TiCoSb)  | 0.0167        | 0.0187        | 0.0205        |
| $R_{\text{p}}$               | 0.128         | 0.136         | 0.143         |
| $R_{\text{wp}}$              | 0.148         | 0.155         | 0.161         |
| $\chi^2$                     | 14.79         | 16.11         | 17.32         |
| Zero displacement            | -0.0050 (3)   | -0.0132 (3)   | -0.0120 (3)   |
| scale factor (TiCoSb)        | 0.0001426 (4) | 0.0001402 (5) | 0.0001371 (5) |
| scale factor (CoSb)          | 0.000132 (2)  | 0.000158 (2)  | 0.000197 (3)  |
| $a$ TiCoSb                   | 5.91129 (8)   | 5.91350 (9)   | 5.91561 (9)   |
| $U$ TiCoSb                   | 0.001 (2)     | 0.001 (3)     | 0.001 (3)     |
| $V$ TiCoSb                   | 0.0316 (7)    | 0.0338 (7)    | 0.0348 (7)    |
| $W$ TiCoSb                   | 0.00031 (4)   | -0.00034 (4)  | -0.00032 (4)  |
| Asym1 TiCoSb                 | 0.000 (1)     | 0.000 (2)     | 0.002 (2)     |
| Asym2 TiCoSb                 | 0.0024 (2)    | 0.0024 (3)    | 0.0026 (3)    |
| $U_{\text{iso}}$ Ti (TiCoSb) | 0.0086 (3)    | 0.0091 (4)    | 0.0095 (4)    |
| $U_{\text{iso}}$ Co (TiCoSb) | 0.0082 (3)    | 0.0086 (3)    | 0.0092 (3)    |
| $U_{\text{iso}}$ Sb (TiCoSb) | 0.0070 (2)    | 0.0072 (2)    | 0.0075 (2)    |
| $a$ CoSb                     | 3.92844 (1)   | 3.93249 (1)   | 3.93742 (1)   |
| $c$ CoSb                     | 5.22127 (1)   | 5.22508 (1)   | 5.22849 (1)   |
| Weight fraction (TiCoSb)     | 89.0 (4)      | 86.9 (4)      | 83.8 (4)      |
| Weight fraction (CoSb)       | 11.0 (2)      | 13.1 (2)      | 16.2 (2)      |
